# Supplementary material for: Hydrothermal synthesis of defect-induced pristine α-NaCe(WO4)2: a novel material for solid state lighting and gas sensing
Source: Royal Society of Chemistry journal article supplement (doi:10.1039/d3ce00312d), 2023-01-01
Supplement: d3ce00312d1.pdf [file d3ce00312d1.pdf]

# Electronic Supplementary Information

## Hydrothermal Synthesis of defect induced pristine $\alpha$ - $\text{NaCe}(\text{WO}_4)_2$ : a novel material for solid state lightning and gas sensing

Nibedita Halder,<sup>(a)</sup> Tanmoy Mondal<sup>(a)</sup>, Tanushri Das<sup>(a, b)</sup>, Debabrata Sarkar,<sup>(c)</sup> Mrinal Pal<sup>(b)</sup>  
and Chandan Kumar Ghosh<sup>(a)\*</sup>

<sup>(a)</sup>School of Materials Science and Nanotechnology, Jadavpur University, Jadavpur, Kolkata  
– 700032, India

<sup>(b)</sup> CSIR-Central Glass and Ceramic Research Institute, Kolkata – 700032

<sup>(c)</sup>Applied NanoPhysics Laboratory, Department of Physics and Nanotechnology, SRM  
Institute of Science and Technology, Kattankulathur – 603203, India

<sup>(\*)</sup>Corresponding author's email ID: [chandan.kghosh@jadavpuruniversity.in](mailto:chandan.kghosh@jadavpuruniversity.in), Tel: 033-2457-  
3028

Table S1: Coordination environment of triclinic NCWO structure.

| Coordinates atoms | x      | y      | Z      | Occupancy | Site occupancy | symmetry |
|-------------------|--------|--------|--------|-----------|----------------|----------|
| Na1               | 0.2815 | 0.7733 | 0.1567 | 1.0       | 1a             | 1        |
| Na2               | 0.7184 | 0.2266 | 0.8432 | 1.0       | 1a             | 1        |
| Ce1               | 0.1740 | 0.2878 | 0.4547 | 1.0       | 1a             | 1        |
| Ce2               | 0.2860 | 0.7121 | 0.5452 | 1.0       | 1a             | 1        |
| O1                | 0.1823 | 0.3500 | 0.7987 | 1.0       | 1a             | 1        |
| O2                | 0.8176 | 0.6500 | 0.2012 | 1.0       | 1a             | 1        |
| O3                | 0.4619 | 0.6413 | 0.2627 | 1.0       | 1a             | 1        |
| O4                | 0.5380 | 0.4586 | 0.7372 | 1.0       | 1a             | 1        |
| O5                | 0.8659 | 0.0119 | 0.1955 | 1.0       | 1a             | 1        |
| O6                | 0.1340 | 0.9880 | 0.8044 | 1.0       | 1a             | 1        |
| O7                | 0.7074 | 0.0107 | 0.4898 | 1.0       | 1a             | 1        |
| O8                | 0.2925 | 0.9893 | 0.5101 | 1.0       | 1a             | 1        |
| O9                | 0.1740 | 0.6339 | 0.5530 | 1.0       | 1a             | 1        |
| O10               | 0.8259 | 0.3660 | 0.4469 | 1.0       | 1a             | 1        |
| O11               | 0.4847 | 0.8316 | 0.0074 | 1.0       | 1a             | 1        |
| O12               | 0.5152 | 0.1683 | 0.9925 | 1.0       | 1a             | 1        |
| O13               | 0.0578 | 0.3132 | 0.1062 | 1.0       | 1a             | 1        |

|     |        |        |        |     |    |   |
|-----|--------|--------|--------|-----|----|---|
| O14 | 0.9421 | 0.6868 | 0.8937 | 1.0 | 1a | 1 |
| O15 | 0.3906 | 0.1712 | 0.2675 | 1.0 | 1a | 1 |
| O16 | 0.6093 | 0.8287 | 0.7324 | 1.0 | 1a | 1 |
| W1  | 0.2753 | 0.2990 | 0.0396 | 1.0 | 1a | 1 |
| W2  | 0.7246 | 0.7009 | 0.9603 | 1.0 | 1a | 1 |
| W3  | 0.6569 | 0.1086 | 0.2887 | 1.0 | 1a | 1 |
| W4  | 0.3430 | 0.8913 | 0.7112 | 1.0 | 1a | 1 |

Table S2: The details of the deconvolution of the FTIR bands

| Samples                      | Peak position (cm <sup>-1</sup> ) | Area (cm <sup>2</sup> ) | FWHM  | $\chi^2$ |      |
|------------------------------|-----------------------------------|-------------------------|-------|----------|------|
| <i>NCWO</i> <sub>120°C</sub> | 660-717                           | 668.644                 | 0.446 | 5.089    | 3.24 |
|                              |                                   | 679.572                 | 0.112 | 7.247    |      |
|                              |                                   | 698.572                 | 0.172 | 13.993   |      |
|                              |                                   | 707.462                 | 0.065 | 8.798    |      |
|                              | 718-777                           | 742.568                 | 0.477 | 15.444   | 3.30 |
|                              |                                   | 762.311                 | 0.614 | 14.002   |      |
|                              | 778-910                           | 811.177                 | 3.500 | 29.541   | 2.1  |
|                              |                                   | 852.943                 | 5.599 | 38.620   |      |
|                              |                                   | 879.857                 | 3.377 | 28.367   |      |
| <i>NCWO</i> <sub>140°C</sub> | 660-717                           | 669.343                 | 0.181 | 5.242    | 2.24 |
|                              |                                   | 680.665                 | 0.047 | 5.993    |      |
|                              |                                   | 700.475                 | 0.118 | 13.643   |      |
|                              |                                   | 704.758                 | 0.042 | 15.349   |      |
|                              | 718-777                           | 738.186                 | 0.342 | 12.033   | 3.81 |
|                              |                                   | 751.922                 | 0.700 | 21.808   |      |

|  |         |         |       |        |      |
|--|---------|---------|-------|--------|------|
|  | 778-910 | 814.374 | 4.428 | 36.893 | 2.43 |
|  |         | 852.670 | 5.636 | 40.724 |      |
|  |         | 881.042 | 3.264 | 26.692 |      |

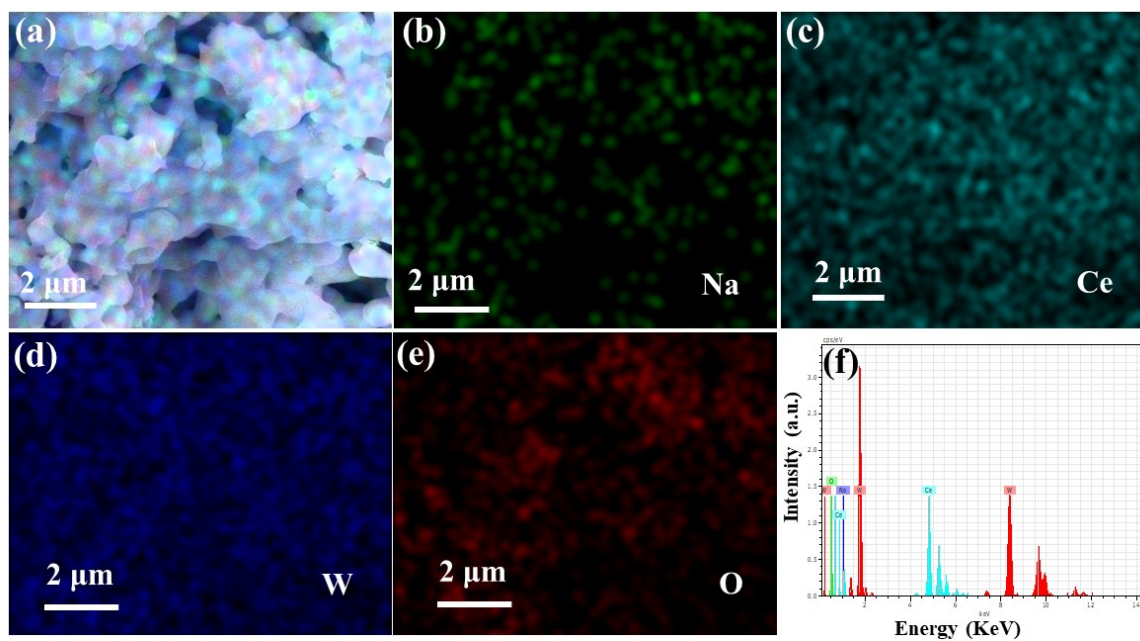

Figure S1: The elemental mapping of  $NCWO$   $_{120}^{0}C$

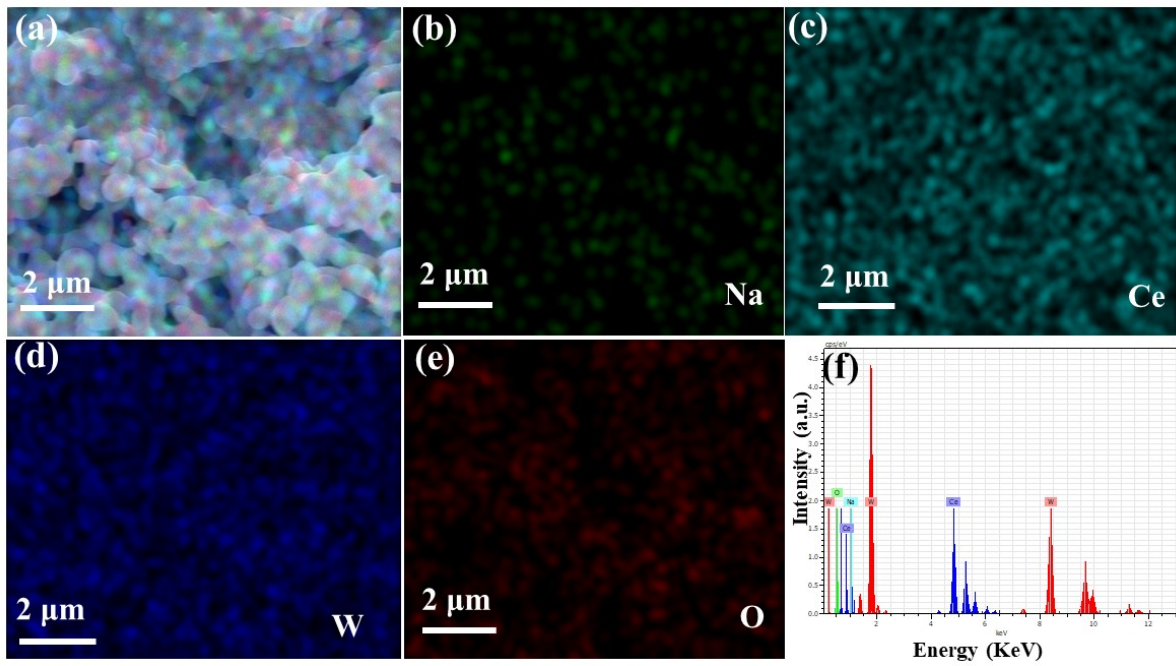

Figure S2: The elemental mapping of  $NCWO_{140}^0C$

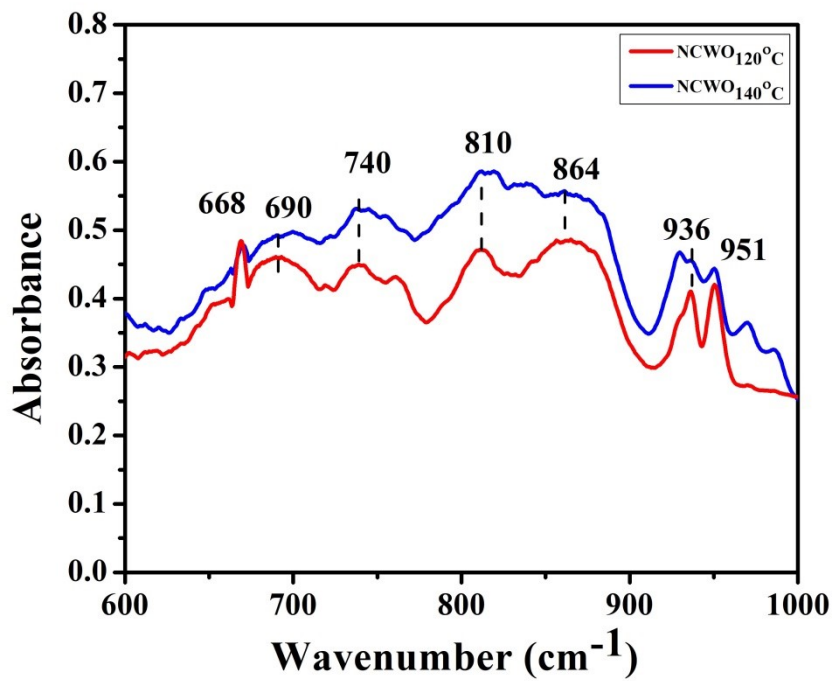

Figure S3: FTIR spectra of  $NCWO_{120}^0C$  and  $NCWO_{140}^0C$ .

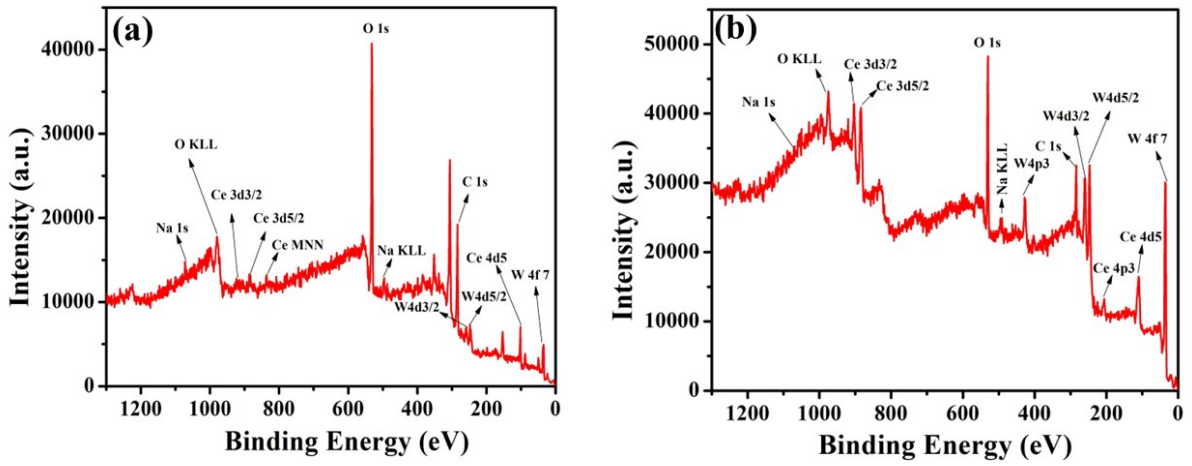

Figure S4: XPS wide spectrum of Ce-3d, W-4f, O-1s, Na-1s of (a)  $NCWO_{120}^{0}C$  and (b)  $NCWO_{140}^{0}C$  respectively.

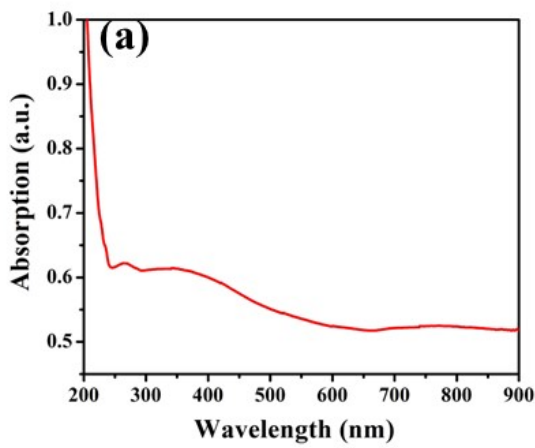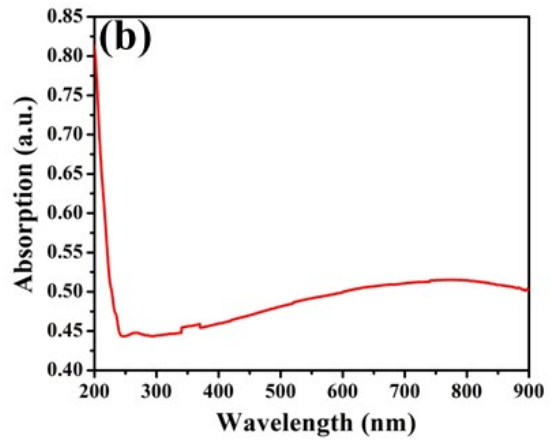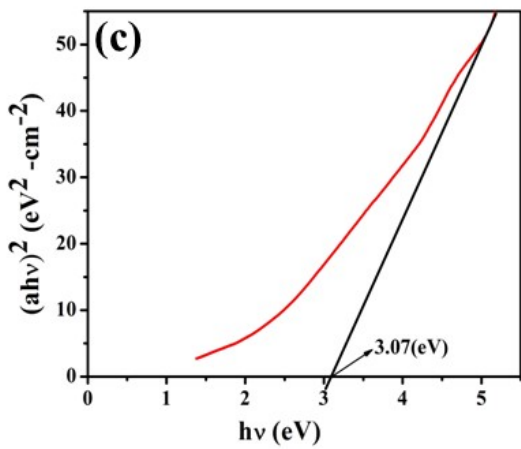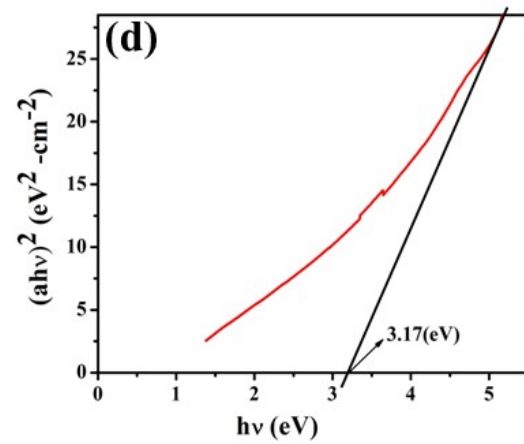

Figure S5: UV spectra (a, b) and corresponding band gap calculation (c, d) of  $NCWO_{120}^{0C}$  and  $NCWO_{140}^{0C}$  respectively.
